# Supplementary material for: Bacteriophage therapy plus fecal microbiota transplantation to treat recurrent urinary tract infection (rUTI): a case series
Source: Research Square preprint supplement (doi:10.21203/rs.3.rs-7581408/v1), 2025-09-26
Supplement: Supplementary file 1 [file c4368992ebd44635b6b522dc.xlsx]

## Sheet: E. coli official
#Missing values in Distance Columns	Perc. Good Targets	Patient	Timepoint	ST Warwick	Avg. Coverage (Assembled)	cgMLST Perc. Good Targets (initially)	O Type	H Type	CC Warwick	adk	fumC	gyrB	icd	mdh	purA	recA	Beta-lactam	Cephalosporin	Quinolone	Tetracycline	Stx1	Stx2	aafA	aafB	aafC	aafD	aap aspU	afaA-VIII	afaA	afaB-I	afaB-VIII	afaC-I	afaC-III	afaC-VII	afaC-VIII	afaD-VII	afaD-VIII	afaD	afaE-I	afaE-II	afaE-III	afaE-V	afaE-VII	afaE-VIII	afaF-III	afaF-VII	afaG-VII	agg3A	agg3B
16	99.4	Patient 1	Pre	127	69	99.4	O6	H31		13	14	19	36	23	11	10	blaEC (AmpC)		marR_S3N	tet(B)
16	99.4	Patient 1	Post	127	96	99.4	O6	H31		13	14	19	36	23	11	10	blaEC (AmpC)		marR_S3N	tet(B)
16	99.4	Patient 2	Pre	17729	123	99.4	O75	H5		14	14	10	200	17	7	1355		blaEC-5 (AmpC)	gyrA_D87N / gyrA_S83L / marR_S3N / parC_S80I / parE_L416F
18	99.3	Patient 2	Post	73	37	99.3	O6	H1	ST73 Cplx	36	24	9	13	17	11	25		blaEC-5 (AmpC)
16	99.4	Patient 3	Pre	1193	44	99.4	O18*	H5	ST14 Cplx	14	14	10	200	17	7	10	blaTEM-1	blaEC-5 (AmpC)	gyrA_D87N / gyrA_S83L / marR_S3N / parC_S80I / parE_L416F
15	99.4	Patient 3	Pre	1193	130	99.4	O18*	H5	ST14 Cplx	14	14	10	200	17	7	10	blaTEM-1	blaEC-5 (AmpC)	gyrA_D87N / gyrA_S83L / marR_S3N / parC_S80I / parE_L416F
15	99.4	Patient 3	Post	1193	69	99.4	O18*	H5	ST14 Cplx	14	14	10	200	17	7	10	blaTEM-1	blaEC-5 (AmpC)	gyrA_D87N / gyrA_S83L / marR_S3N / parC_S80I / parE_L416F
							*manually added from another tool
[truncated: 2,769 more columns]
