# Supplementary material for: Bacteriophage therapy plus fecal microbiota transplantation to treat recurrent urinary tract infection (rUTI): a case series
Source: Research Square preprint supplement (doi:10.21203/rs.3.rs-7581408/v1), 2025-09-26
Supplement: Supplementary file 2 [file 2bc071ecfb62925c70589913.pdf]

Sonja Milek  
Universität Zürich  
Forschung Neuro-Urologie  
Lengghalde 5  
8008 Zürich  
SWITZERLAND

Balgrist Campus

## Test Report S23BD03576

Report Date: 03/05/2023

Version 01 (English)

Your Reference: Bat003

### In case of questions about this report please contact:

Pieter-Jan Ceyssens (email: [Pieter-Jan.Ceyssens@sciensano.be](mailto:Pieter-Jan.Ceyssens@sciensano.be) - tel: )

Wesley Mattheus (email: [wesley.mattheus@sciensano.be](mailto:wesley.mattheus@sciensano.be) - tel: +32 (0)2/373 32 24)

### Sample Information

Sciensano Sample Ref.: S23BD03576

Client Sample Ref.: **Bat003**

Sample Type:

Sample State:

Received Date: 02/05/2023

Lab: Medicines

### Microbial contamination

Start: 21/04/2023 End: 28/04/2023 SOP / Method of Analysis: Ph Eur monograph

| Parameter | Result  |
|-----------|---------|
| TAMC      | Conform |
| TYMC      | Conform |

Lab: Biochemistry Vaccine

### Endotoxin phages by rFC

Start: 26/04/2023 End: 26/04/2023 SOP / Method of Analysis: SOP 42/III-115

| Parameter         | Result | Units |
|-------------------|--------|-------|
| Endotoxins Phages | 112,3  | EU/mL |

**Remarks / interpretation:** *test réalisé par ZB, réintroduit dans le LIMS par FLA*

Above results relate only to the tested samples identified on the report. This test report shall not be reproduced except in full, without written approval of the head of the laboratory. Sampling of the above identified samples was not performed by the laboratory. The (technical) measurement uncertainty of the results may be communicated on request by the contact person. The opinions/interpretations expressed in this report are outside the scope of the MJA attestation of this OMCL.

<sup>2</sup> Identified results were modified since the previous version of the report. The new results replace the previously reported results.

<sup>3</sup> Result obtained via outsourcing. The code of the outsourced laboratory is shown on the report above the results. The complete identification of the laboratory can be obtained upon request from Sciensano.

**APPROVED**

By Pieter-Jan Ceyssens on 03/05/2023 13:55:54

Lab Supervisor
